# Supplementary material
Source: ML conference proceedings conference paper supplement (https://openaccess.thecvf.com/content/cvpr_2017/html/Liu_Discretely_Coding_Semantic_2017_CVPR_paper.html)
Supplement: Supplementary file 1 [file Liu_Discretely_Coding_Semantic_2017_CVPR_supplemental.pdf]

# Supplementary for Discretely Coding Semantic Rank Orders for Supervised Image Hashing

Li Liu<sup>1</sup>, Ling Shao<sup>1</sup>, Fumin Shen<sup>2</sup>, and Mengyang Yu<sup>3</sup>

<sup>1</sup>School of Computing Science, University of East Anglia, UK

<sup>2</sup>Center for Future Media, University of Electronic Science and Technology of China, China

<sup>3</sup>Computer Vision Laboratory, ETH Zurich, Switzerland

{li.liu, ling.shao}@uea.ac.uk, fumin.shen@gmail.com, mengyangyu@gmail.com

**Theorem 1.** Let  $\{\mathbf{B}^{(t)}\}$  be generated by the update rule of Algorithm 1, then  $\{f(\mathbf{B}^{(t)})\}$  is monotonically non-increasing, i.e.,  $f(\mathbf{B}^{(t+1)}) \leq f(\mathbf{B}^{(t)})$ , and  $\{\mathbf{B}^{(t)}\}$  converges.

*Proof.* According to the linearization  $\hat{f}_t(\mathbf{B}) = f(\mathbf{B}^{(t)}) + \langle \nabla f(\mathbf{B}^{(t)}), \mathbf{B} - \mathbf{B}^{(t)} \rangle$ , we can observe that  $\hat{f}_t(\mathbf{B}^{(t)}) = f(\mathbf{B}^{(t)})$  and we have

$$\begin{aligned} \hat{f}_t(\mathbf{B}^{(t+1)}) - \hat{f}_t(\mathbf{B}^{(t)}) &= \langle \nabla f(\mathbf{B}^{(t)}), \mathbf{B}^{(t+1)} - \mathbf{B}^{(t)} \rangle \\ &= \sum_{p,q} \left\langle \nabla_{p,q} f(\mathbf{B}^{(t)}), \left( \mathbf{B}^{(t+1)} \right)_{p,q} - \left( \mathbf{B}^{(t)} \right)_{p,q} \right\rangle. \end{aligned}$$

For each term in the above summation,  $\left\langle \nabla_{p,q} f(\mathbf{B}^{(t)}), \left( \mathbf{B}^{(t+1)} \right)_{p,q} - \left( \mathbf{B}^{(t)} \right)_{p,q} \right\rangle \neq 0$  if and only if  $\nabla_{p,q} f(\mathbf{B}^{(t)}) \neq 0$  and  $\left( \mathbf{B}^{(t+1)} \right)_{p,q} - \left( \mathbf{B}^{(t)} \right)_{p,q} \neq 0$ .

There are several cases for  $\nabla_{p,q} f(\mathbf{B}^{(t)})$  and  $\left( \mathbf{B}^{(t+1)} \right)_{p,q} - \left( \mathbf{B}^{(t)} \right)_{p,q}$ . If  $\nabla_{p,q} f(\mathbf{B}^{(t)}) = 0$  for all  $p, q$ , then  $f(\mathbf{B}^{(t)})$  is the local minimum value and there is no further update iteration.

Let us consider the case that there exist  $p, q$  such that  $\nabla_{p,q} f(\mathbf{B}^{(t)}) \neq 0$ . If  $\left( \mathbf{B}^{(t+1)} \right)_{p,q} - \left( \mathbf{B}^{(t)} \right)_{p,q} = 0$ , then  $\langle \nabla_{p,q} f(\mathbf{B}^{(t)}), \left( \mathbf{B}^{(t+1)} \right)_{p,q} - \left( \mathbf{B}^{(t)} \right)_{p,q} \rangle = 0$ . If  $\left( \mathbf{B}^{(t+1)} \right)_{p,q} - \left( \mathbf{B}^{(t)} \right)_{p,q} \neq 0$ , i.e.,  $\left( \mathbf{B}^{(t+1)} \right)_{p,q} = -\left( \mathbf{B}^{(t)} \right)_{p,q}$ , according to the update rule,

$$\left( \mathbf{B}^{(t+1)} \right)_{p,q} = \text{sign}(-\nabla_{p,q} f(\mathbf{B}^{(t)})).$$

In this case,

$$\begin{aligned} &\langle \nabla_{p,q} f(\mathbf{B}^{(t)}), \left( \mathbf{B}^{(t+1)} \right)_{p,q} - \left( \mathbf{B}^{(t)} \right)_{p,q} \rangle \\ &= \langle \nabla_{p,q} f(\mathbf{B}^{(t)}), \left( \mathbf{B}^{(t+1)} \right)_{p,q} + \left( \mathbf{B}^{(t+1)} \right)_{p,q} \rangle \quad (1) \\ &= \langle \nabla_{p,q} f(\mathbf{B}^{(t)}), 2 \text{sign}(-\nabla_{p,q} f(\mathbf{B}^{(t)})) \rangle \\ &< 0. \end{aligned}$$

Therefore, if  $f(\mathbf{B}^{(t)})$  is not a local minimum value, we have

$$\hat{f}_t(\mathbf{B}^{(t+1)}) - \hat{f}_t(\mathbf{B}^{(t)}) = \langle \nabla f(\mathbf{B}^{(t)}), \mathbf{B}^{(t+1)} - \mathbf{B}^{(t)} \rangle < 0$$

which means  $\hat{f}_t(\mathbf{B}^{(t+1)}) < \hat{f}_t(\mathbf{B}^{(t)})$  for any variable  $S \neq \emptyset$  in the update rule of  $\mathbf{B}^{(t)}$ .

If  $f(\mathbf{B}^{(t+1)})$  is already less than  $f(\mathbf{B}^{(t)})$ , then  $f$  is monotonically decreasing by the update rule. If  $f(\mathbf{B}^{(t+1)}) > f(\mathbf{B}^{(t)})$ , then we prove that there exists  $S$  such that  $\mathbf{B}^{(t+1)} = \mathcal{F}(\text{sign}(-\nabla f(\mathbf{B}^{(t)})), \mathbf{B}^{(t)}, S)$  satisfies  $f(\mathbf{B}^{(t+1)}) \leq f(\mathbf{B}^{(t)})$ , where matrix function  $\mathcal{F}(\mathbf{M}, \mathbf{N}, S)$  is defined as

$$(\mathcal{F}(\mathbf{M}, \mathbf{N}, S))_{p,q} = \begin{cases} \mathbf{M}_{p,q} & \text{if } (p, q) \in S, \\ \mathbf{N}_{p,q} & \text{otherwise,} \end{cases}$$

with  $S \subseteq \{(p, q) | \mathbf{M}_{p,q} \neq \mathbf{N}_{p,q}, \mathbf{M}_{p,q} \neq 0\}$  and the size of  $S$  is controlled by a parameter  $\varphi$ . Then we have

$$\begin{aligned} f(\mathbf{B}^{(t)}) &= \hat{f}_t(\mathbf{B}^{(t)}) = \hat{f}_t(\mathcal{F}(\text{sign}(-\nabla f(\mathbf{B}^{(t)})), \mathbf{B}^{(t)}, \emptyset)) \\ &> \hat{f}_t(\mathcal{F}(\text{sign}(-\nabla f(\mathbf{B}^{(t)})), \mathbf{B}^{(t)}, S)) = \hat{f}_t(\mathbf{B}^{(t+1)}) \end{aligned}$$

for any  $S \neq \emptyset$ . In this way, we try to find a small neighborhood of  $\mathbf{B}^{(t)}$ , on which  $\hat{f}_t(\mathbf{B})$  can approximately represent  $f(\mathbf{B})$ . Considering the variable  $S$  with  $|S| = 1$  (i.e.,

$\varphi = \frac{1}{nm}$ ), the following set:

$$\begin{aligned} \mathcal{N}_1 = & \left\{ \mathcal{F}(\text{sign}(-\nabla f(\mathbf{B}^{(t)})), \mathbf{B}^{(t)}, S) \mid \right. \\ & S \subseteq \left\{ (p, q) \mid (\text{sign}(-\nabla f(\mathbf{B}^{(t)})))_{p,q} \neq (\mathbf{B}^{(t)})_{p,q} \right. \\ & \left. \left. \text{and } (\text{sign}(-\nabla f(\mathbf{B}^{(t)})))_{p,q} \neq 0 \right\} \right\} \end{aligned}$$

contains all the neighbor binary points of  $\mathbf{B}^{(t)}$  in the descending direction.

If  $\exists \mathbf{B}_1 \in \mathcal{N}_1$  such that  $f(\mathbf{B}_1) \leq \hat{f}_t(\mathbf{B}_1)$ , we have  $f(\mathbf{B}_1) \leq \hat{f}_t(\mathbf{B}_1) < \hat{f}_t(\mathbf{B}^{(t)}) = f(\mathbf{B}^{(t)})$ . Then there exists  $S$  such that  $f(\mathbf{B}^{(t+1)}) \leq f(\mathbf{B}^{(t)})$ .

If  $\exists \mathbf{B}_1 \in \mathcal{N}_1$  such that  $|f(\mathbf{B}_1) - \hat{f}_t(\mathbf{B}_1)| \leq \hat{f}_t(\mathbf{B}^{(t)}) - \hat{f}_t(\mathbf{B}_1)$ , we have  $f(\mathbf{B}_1) - \hat{f}_t(\mathbf{B}_1) \leq \hat{f}_t(\mathbf{B}^{(t)}) - \hat{f}_t(\mathbf{B}_1)$ , which leads to  $f(\mathbf{B}_1) \leq \hat{f}_t(\mathbf{B}^{(t)}) = f(\mathbf{B}^{(t)})$ . Then there exists  $S$  such that  $f(\mathbf{B}^{(t+1)}) \leq f(\mathbf{B}^{(t)})$ .

If  $\forall \mathbf{B} \in \mathcal{N}_1$  we have  $f(\mathbf{B}) > \hat{f}_t(\mathbf{B})$  and  $|f(\mathbf{B}) - \hat{f}_t(\mathbf{B})| > \hat{f}_t(\mathbf{B}^{(t)}) - \hat{f}_t(\mathbf{B})$ , then  $f(\mathbf{B}) > \hat{f}_t(\mathbf{B}^{(t)}) = f(\mathbf{B}^{(t)})$ ,  $\forall \mathbf{B} \in \mathcal{N}_1$ . In this condition, the function value on every neighbor binary point of  $\mathbf{B}^{(t)}$  in the descending direction is larger than  $f(\mathbf{B}^{(t)})$ , which renders  $f(\mathbf{B}^{(t)})$  is a local minimum value for the domain  $\{\pm 1\}^{m \times n}$ .

Therefore,  $\{f(\mathbf{B}^{(t)})\}$  is monotonically non-increasing. Since  $\{\pm 1\}^{m \times n}$  is a finite set and  $f$  is a bounded function ( $f \geq 0$ ),  $\{\mathbf{B}^{(t)}\}$  will converge under the above-defined update rule.  $\square$
